# Supplementary material for: A C2H2-type zinc finger protein TaZFP8-5B negatively regulates disease resistance
Source: PubMed Central journal article supplement — BMC Plant Biol. 2024 Nov 23;24:1116. doi: 10.1186/s12870-024-05843-6 (PMC11585113; doi:10.1186/s12870-024-05843-6), 2024-11-23
Supplement: 12870_2024_5843_MOESM1_ESM.pdf [file 12870_2024_5843_MOESM1_ESM.pdf]

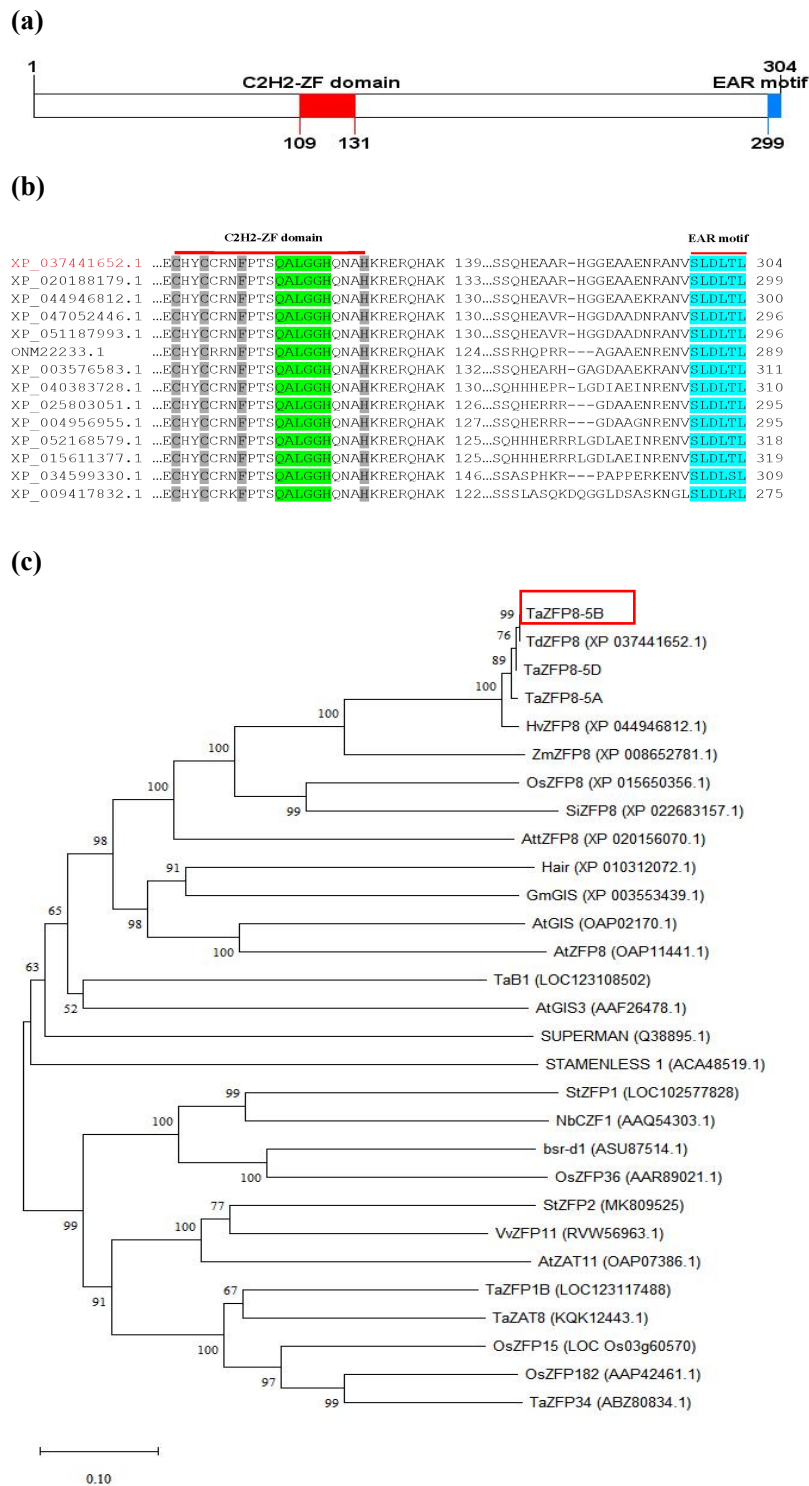

**Fig. S1** Sequence analysis of TaZFP8. **(a)** Schematic diagram of TaZFP8 protein structure. **(b)** Sequence alignment of TaZFP8 with other C2H2-type ZFPs. The sequences were aligned with DNAMAN software. C2H2-ZF domain (gray), QALGGH conserved motif (green), and EAR motif (blue). **(c)** Phylogenetic analysis of TaZFP8. Different C2H2-ZFs from *T. aestivum* (Ta), *T. dicoccoides* (Td), *Hordeum vulgare* (Hv), *Zea mays* (Zm), *Oryza sativa* (Os), *Setaria italica* (Si), *Aegilops tauschii* (Att), *Arabidopsis thaliana* (At), *Solanum tuberosum* (St), *Nicotiana benthamiana* (Nb) and *Vitis vinifera* (Vv) were used for the phylogenetic analyses using MEGA11.
