# Supplementary material for: A C2H2-type zinc finger protein TaZFP8-5B negatively regulates disease resistance
Source: PubMed Central journal article supplement — BMC Plant Biol. 2024 Nov 23;24:1116. doi: 10.1186/s12870-024-05843-6 (PMC11585113; doi:10.1186/s12870-024-05843-6), 2024-11-23
Supplement: 12870_2024_5843_MOESM2_ESM.pdf [file 12870_2024_5843_MOESM2_ESM.pdf]

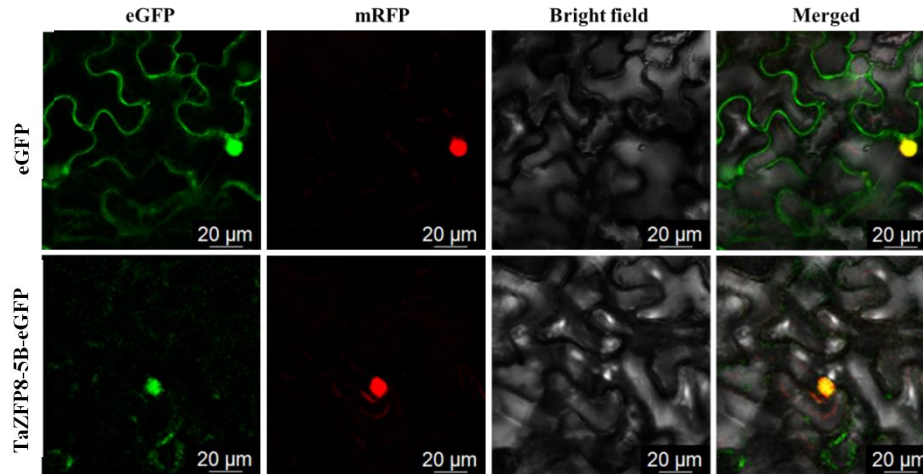

**Fig. S2** Subcellular localization of TaZFP8-5B protein. TaZFP8-5B-eGFP fusion protein and eGFP were separately mixed with NLS-mRFP (nuclear localization marker protein) and expressed in the leaves of *N. benthamiana*.
