# Supplementary material for: A C2H2-type zinc finger protein TaZFP8-5B negatively regulates disease resistance
Source: PubMed Central journal article supplement — BMC Plant Biol. 2024 Nov 23;24:1116. doi: 10.1186/s12870-024-05843-6 (PMC11585113; doi:10.1186/s12870-024-05843-6), 2024-11-23
Supplement: 12870_2024_5843_MOESM3_ESM.pdf [file 12870_2024_5843_MOESM3_ESM.pdf]

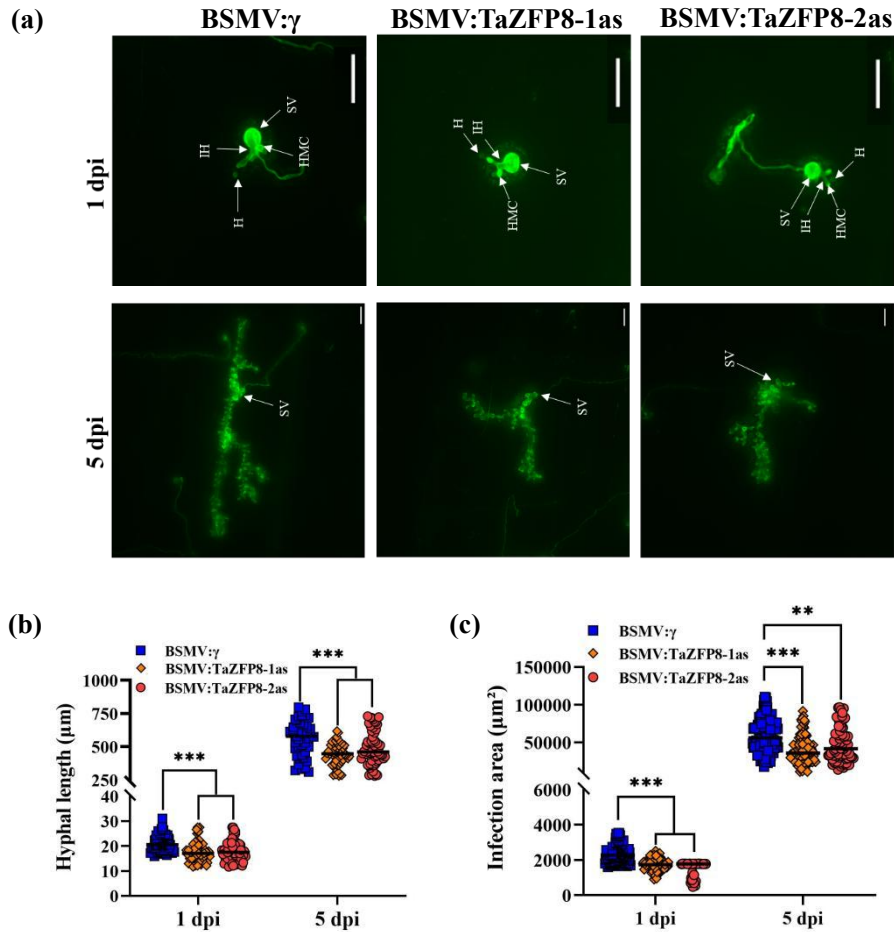

**Fig. S3** Fungal development in *TaZFP8*-silenced leaves during initial stages of *Pst* inoculation. (a) Microscopic observation of pathogen development in *TaZFP8*-silenced leaves at different time points after *Pst* inoculation. (b) Hyphal length and (c) infection area of *Pst* in *TaZFP8*-silenced leaves after being infected with CYR34. Wheat leaves were sampled at 1 and 5 dpi and observed microscopically after stained with WGA. SV, substomatal vesicle; H, haustoria; IH, infection hypha; HMC, haustorial mother cell; and SH, secondary hyphae. Bars = 100 μm. Asterisks represent significant differences. \*\*  $p < 0.01$ , \*\*\*  $p < 0.001$ .
