# Supplementary material for: A C2H2-type zinc finger protein TaZFP8-5B negatively regulates disease resistance
Source: PubMed Central journal article supplement — BMC Plant Biol. 2024 Nov 23;24:1116. doi: 10.1186/s12870-024-05843-6 (PMC11585113; doi:10.1186/s12870-024-05843-6), 2024-11-23
Supplement: 12870_2024_5843_MOESM4_ESM.pdf [file 12870_2024_5843_MOESM4_ESM.pdf]

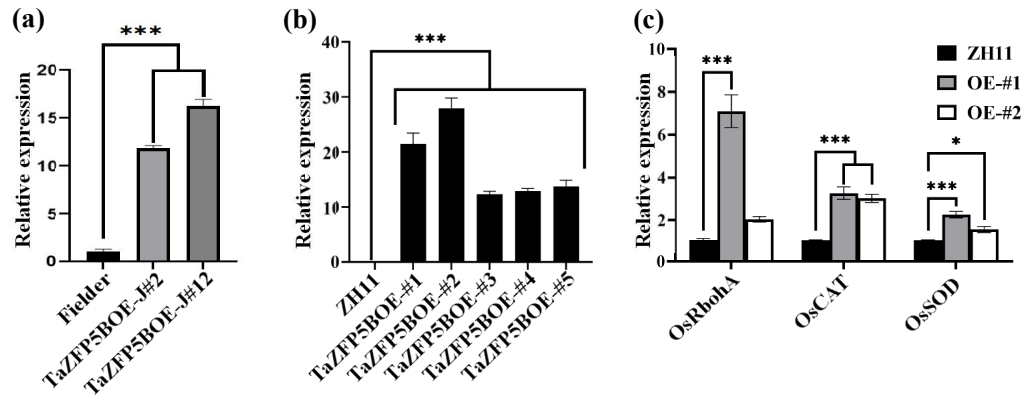

**Fig. S4** Transcript levels of *TaZFP8-5B* and ROS-related genes in transgenic plants. **(a)** Transcript levels in Fielder and *TaZFP8-5BOE* plants. **(b)** Transcript levels of *TaZFP8-5B* in the rice cultivar ZH11 background. *TaZFP8-5BEO*-#1 to *TaZFP8-5BEO*-#5, overexpression transgenic events. **(c)** Relative expression of *OsRbohA*, *OsCAT*, and *OsSOD* in rice leaves at 1 dpi. The transcript levels of the genes in *TaZFP8-5BOE*-#1 and *TaZFP8-5BEO*-#2 leaves were detected by qRT-PCR. Error bars represent SEM from three replicates. Asterisks represent significant differences. \* $p < 0.05$ , \*\*\* $p < 0.001$ .
