# Supplementary material for: A C2H2-type zinc finger protein TaZFP8-5B negatively regulates disease resistance
Source: PubMed Central journal article supplement — BMC Plant Biol. 2024 Nov 23;24:1116. doi: 10.1186/s12870-024-05843-6 (PMC11585113; doi:10.1186/s12870-024-05843-6), 2024-11-23
Supplement: 12870_2024_5843_MOESM5_ESM.pdf [file 12870_2024_5843_MOESM5_ESM.pdf]

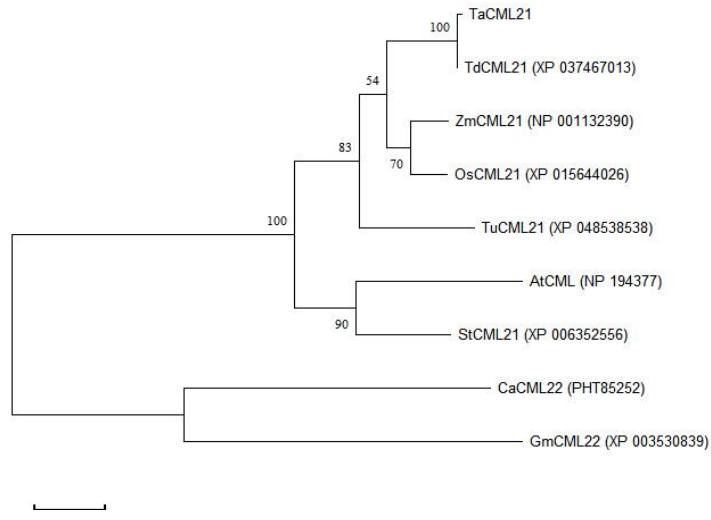

**Fig. S5** Phylogenetic tree of TaCML21 and CML variants from various species. *T. aestivum* (Ta), *T. dicoccoides* (Td), *T. urartu* (Tu), *Z. mays* (Zm), *O. sativa* (Os), *A. thaliana* (At), *S. tuberosum* (St), *Capsicum annuum* (Ca), *Glycine max* (Gm).
