# Supplementary material for: A C2H2-type zinc finger protein TaZFP8-5B negatively regulates disease resistance
Source: PubMed Central journal article supplement — BMC Plant Biol. 2024 Nov 23;24:1116. doi: 10.1186/s12870-024-05843-6 (PMC11585113; doi:10.1186/s12870-024-05843-6), 2024-11-23
Supplement: 12870_2024_5843_MOESM7_ESM.pdf [file 12870_2024_5843_MOESM7_ESM.pdf]

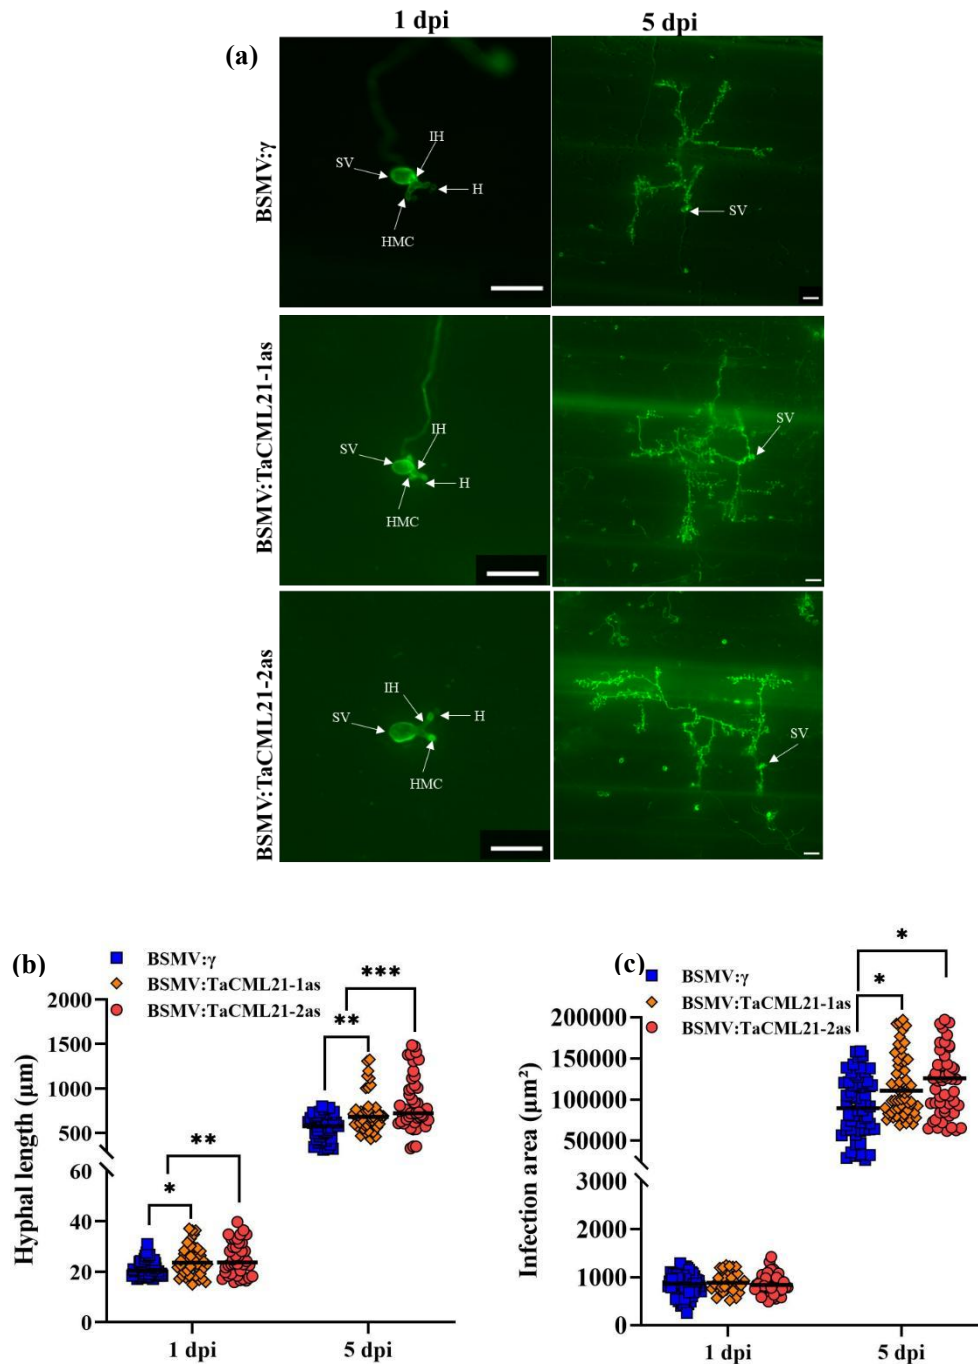

**Fig. S7** Fungal development in *TaCML21*-silenced leaves during initial stages of *Pst* inoculation. **(a)** Microscopic observation of *Pst* growth in *TaCML21*-silenced leaves at 1 and 5 dpi. **(b)** Hyphal length and **(c)** infection area of *Pst* in gene silenced leaves after infected with CYR34. Wheat leaves were sampled at different time points and observed microscopically after stained with WGA. SV, substomatal vesicle; H, haustoria; IH, infection hypha; HMC, haustorial mother cell; and SH, secondary hyphae. Bars = 100 μm. \*  $p < 0.05$ , \*\*  $p < 0.01$ , \*\*\*  $p < 0.001$ .
