# Supplementary material for: A C2H2-type zinc finger protein TaZFP8-5B negatively regulates disease resistance
Source: PubMed Central journal article supplement — BMC Plant Biol. 2024 Nov 23;24:1116. doi: 10.1186/s12870-024-05843-6 (PMC11585113; doi:10.1186/s12870-024-05843-6), 2024-11-23
Supplement: 12870_2024_5843_MOESM8_ESM.pdf [file 12870_2024_5843_MOESM8_ESM.pdf]

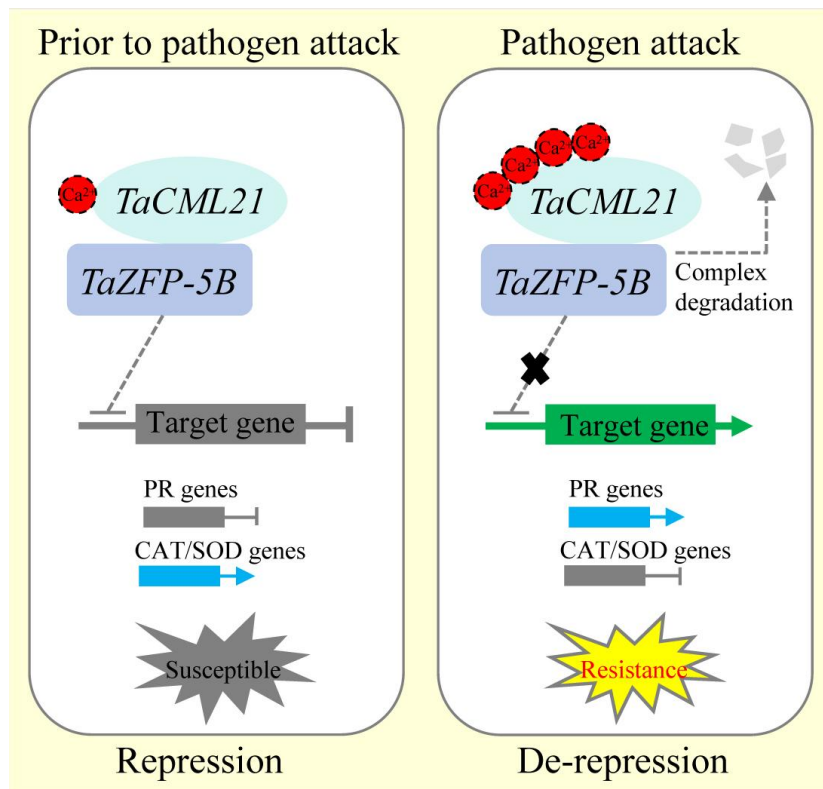

**Fig. S8** Possible working model of TaCML21-TaZFP-5B complex in plant defense responses. The TaCML21-TaZFP-5B complex represses the expression of target gene(s) that are involved in regulation of plant defense; upon pathogen infection, the generated  $\text{Ca}^{2+}$  signal could interact with TaCML21-TaZFP-5B complex that leads to the complex degradation and transcriptional de-repression and activation of plant defense responses. Dash lines represent hypothetical situations. Red spheres denote  $\text{Ca}^{2+}$  ions. The number of red spheres represent the level of concentration.
