# Supplementary material for: A C2H2-type zinc finger protein TaZFP8-5B negatively regulates disease resistance
Source: PubMed Central journal article supplement — BMC Plant Biol. 2024 Nov 23;24:1116. doi: 10.1186/s12870-024-05843-6 (PMC11585113; doi:10.1186/s12870-024-05843-6), 2024-11-23
Supplement: 12870_2024_5843_MOESM9_ESM.pdf [file 12870_2024_5843_MOESM9_ESM.pdf]

**Table S1 List of primers used in this study**

| <b>Primer name</b> | <b>Function</b>      | <b>Primer sequences (5'-3')</b>                                                |
|--------------------|----------------------|--------------------------------------------------------------------------------|
| TaZFP8-CDS         | Full cDNA of TaZFP8  | F:ATGGCCATGAGCGAGCAAGA<br>R:TTACAGGGTGAGATCCAGGCTCA                            |
| TaCML21-CDS        | Full cDNA of TaCML21 | F:ATGGGAGGCGTGTGGGA<br>R:TCATTCATCGTCGCCTC                                     |
| q-TaZFP8-5B        | qRT-PCR              | F:TGCTCCCGCCAGGCAGC<br>R:ACGCGTGGGCGGGTAGTGA                                   |
| TaZFP8-1as         | qRT-PCR              | F:CGAGTGCCACTACTGCT<br>R:CTGCCGTTGATCGGCTG                                     |
| TaZFP8-2as         | qRT-PCR              | F:CACGCGTACCCCGCCTTC<br>R:CTGCCGTTGATCGGCTG                                    |
| TaCML21-1as        | qRT-PCR              | F:ACATGGAACCTTCGGTCAA<br>R:TGAAAGCAATTCCTCAGCTC                                |
| TaCML21-2as        | qRT-PCR              | F:ATAAGTGATCTCTTTGAAGCC<br>R:AGATCTCCTAATCCCATCTTTG                            |
| <i>TaPR1</i>       | qRT-PCR              | F:GAGAATGCAGACGCCCAAGC<br>R:CTGGAGCTTGCACTCGTTGATC                             |
| <i>TaPR2</i>       | qRT-PCR              | F:AGGATGTGCTTCCATGTTGCCG<br>R:AAGTAGATGCGCATGCCGTTGATG                         |
| <i>TaEF-1a</i>     | qRT-PCR              | F:TGGTGTCAAGCCTGGTATGGT<br>R:ACTCATGGTGCATCTCAACGGACT                          |
| <i>PstEF1</i>      | qRT-PCR              | TTCGCCGTCCGTGATATGAGACAA<br>ATGCCATCATGGTGGTGGAGTGA                            |
| <i>TaRboh</i>      | qRT-PCR              | F:ATGTTCCGCAACTTGGTGACT<br>R:CGTCTGCTCTAAGAAGACCACTTTT                         |
| <i>TaSOD</i>       | qRT-PCR              | F:TCCTTTGACTGGCCCTAATG<br>R:CTTCCACCAGCATTTCCAGT                               |
| <i>TaCAT</i>       | qRT-PCR              | F:CGCTCACTGATGCTCGTGTACC<br>R:TCCATCTACATGCTCGGCTTAATCTTG                      |
| <i>OsUBQ5</i>      | qRT-PCR              | F:AACCAGCTGAGGCCCAAGA<br>R:ACGATTGATTTAACCAGTCCATGA                            |
| <i>OsUG</i>        | qRT-PCR              | F:TTCTGGTCCTTCCACTTTCAG<br>R:ACGATTGATTTAACCAGTCCATGA                          |
| <i>MoPot2</i>      | qRT-PCR              | F:ACGACCCGTCTTTACTTATTTGG<br>R:AAGTAGCGTTGGTTTTGTTGGAT                         |
| <i>OsRbohA</i>     | qRT-PCR              | F:GAGCGCGTCTGCCAATAAAC<br>R:TCAATGTAGCCGAGCCCTTC                               |
| <i>OsCAT</i>       | qRT-PCR              | F:TGAAGCCAAGCATGTGAAGA<br>R:GCCCAACGACAACAGAAGAT                               |
| <i>OsSOD</i>       | qRT-PCR              | F:AACAAAGGCAGGGCTGTAGA<br>R:TAAGGTTCCAGGCATCAAG                                |
| TaZFP8-1as         | VIGS                 | F:GCTAGCTGAGCGCCGCCGAGTGCCACTACTGCTG<br>R:TTAGCTAGCTGATTAATTAACCTGCCGTTGATCGGC |

| <b>Primer name</b>           | <b>Function</b>                                 | <b>Primer sequences (5'-3')</b>                                                          |
|------------------------------|-------------------------------------------------|------------------------------------------------------------------------------------------|
| TaZFP8-2as                   | VIGS                                            | F:GCTAGCTGAGCGGCCGCCACGCGTACCCCG<br>R:TTAGCTAGCTGATTAATTAACCGGGCTGCCG                    |
| TaCML21-1as                  | VIGS                                            | F:GCTAGCTGAGCGGCCGCTGAAAGCAATTCTTCAGCTCTTCT<br>R:TTAGCTAGCTGATTAATTAACATGGAACCTCCGGTCAAG |
| TaCML21-2as                  | VIGS                                            | F:GCTAGCTGAGCGGCCGAGATCTCCTAATCCCATCTTG<br>R:TTAGCTAGCTGATTAATTAATAAGTGATCTCTTTGAAGCCTG  |
| NE-TaZFP8-5B                 | BiFC                                            | F:CACGGGGGACTCTAGAATGGCCATGAGCGAG<br>R:TCCATCCCGGAGCGGTACCCAGGGTGAGATCCAGGC              |
| CE-TaCML21                   | BiFC                                            | F:CACGGGGGACTCTAGAATGGGAGGCGTGTTG<br>R:CCCGTTAACTCTAGATTCATCGTCGTCCTCG                   |
| BD-TaZFP8-5B                 | Yeast two-hybrid                                | F:CATGGAGGCCGAATTCATGGCCATGAGCGAGCA<br>R:GCAGGTCGACGGATCCTTACAGGGTGAGATCCAGGC            |
| BD-TaZFP8-5B <sup>AEAR</sup> | Yeast two-hybrid                                | F:CATGGAGGCCGAATTCATGGCCATGAGCGAGCA<br>R:GCAGGTCGACGGATCCACGTTTGCCCTGTTC                 |
| AD-TaCML21                   | Yeast two-hybrid                                | F:CATCGATACGGGATCCATGGGAGGCGTGTTG<br>R:GAGGACGACGATGAATGAGGATCCATCGAGCTCG                |
| BD-TaCML21                   | Yeast two-hybrid                                | F:CATGGAGGCCGAATTCATGGGAGGCGTGTTT<br>R:GCAGGTCGACGGATCCTCATTCATCGTCGTCCTCG               |
| nLUC-TaZFP8-5B               | Split-LUC                                       | F:TCGGTACCCGGGATCCATGGCCATGAGCG<br>R:ACGAGATCTGGTCGACCAGGGTGAGATCCAGGC                   |
| cLUC-TaCML21                 | Split-LUC                                       | F:GCGGTACCCGGGATCCGATGGGAGGCGTGTTG<br>R:AGCTCTGCAGGTCGACTCAITTCATCGTCGTCCTCG             |
| 2300-TaZFP8-5B               | Subcellular localization<br>Rice transformation | F:GGGTACCCGGGATCCATGGCCATGAGCG<br>R:TGGTACTAGTGTGACCAGGGTGAGATCCAGGC                     |
| 2300-TaCML21                 | Subcellular localization                        | F:TTTGAGAGGACAGGGTACCATGGGAGGCGTGTTG<br>R:TCACCATGGTACTAGTTTCATCGTCGTCCTCGTTT            |
| 1300-TaZFP8-5B               | Wheat transformation                            | GGCCTACTAGGATCATGGCCATGAGCGAGC<br>CGAACGAAAGCTCTGTTACAGGGTGAGATCCAGGCTCAC                |
